# Supplementary material for: Room-temperature spin valve effect in the TiCr2N4 monolayer
Source: Royal Society of Chemistry journal article supplement (doi:10.1039/d2tc02794a), 2022-01-01
Supplement: d2tc02794a1.pdf [file d2tc02794a1.pdf]

Electronic Supplementary Information for  
Room-temperature spin valve effect in  $\text{TiCr}_2\text{N}_4$  monolayer

Haoshen Ye,<sup>a,b</sup> Lisha Liu,<sup>a</sup> Dongmei Bai,<sup>c</sup> G. P. Zhang,<sup>d</sup> Juntao Zhang,<sup>a</sup> and Jianli Wang<sup>\*,a</sup>

<sup>a</sup> School of Materials and Physics, China University of Mining and Technology, Xuzhou 221116, China

<sup>b</sup> School of Physics, Southeast University, Nanjing 211189, China

<sup>c</sup> School of Mathematics, China University of Mining and Technology, Xuzhou 221116, China

<sup>d</sup> Department of Physics, Indiana State University, Terre Haute, Indiana 47809, USA

---

\* Corresponding author.

E-mail address: [jlwang@cumt.edu.cn](mailto:jlwang@cumt.edu.cn) (Jianli Wang).

**I. Curie temperature.** The evolution of magnetization as the function of temperature is simulated via Monte Carlo simulation based on the Heisenberg type Hamiltonian. A supercell of  $12 \times 12 \times 1$  containing 288 Cr atoms is used for the Monte Carlo simulation. Steps for both achieving thermal equilibrium and sampling by Metropolis algorithm are set to  $10^5$  steps. The Heisenberg type Hamiltonian of  $\text{TiCr}_2\text{N}_4$  can be described as

$$H = -J_{ij} \sum_{ij} \hat{S}_i \cdot \hat{S}_j - A_i \sum_i (\hat{S}_i \cdot \hat{z}_i)^2$$

where,  $J$  is the exchange parameter between site  $i$  and  $j$ .  $A_i$  and  $\hat{z}_i$  is the single-ion anisotropy energy and the unit vector of easy magnetization axis of Cr atom, respectively. Five different magnetic structures (Fig. S1) are considered for calculating the exchange parameters.

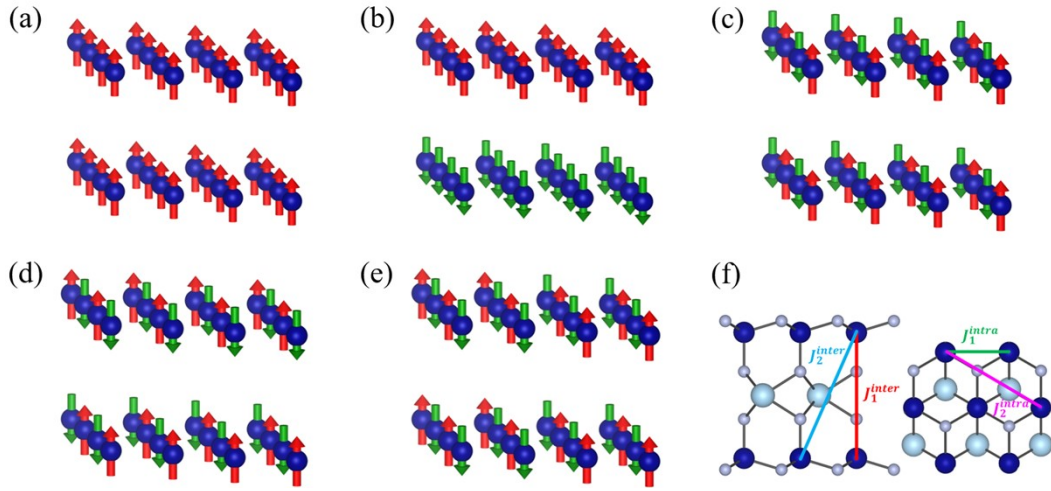

**FIG. S1.** Schematic of the five magnetic structures of monolayer  $\text{TiCr}_2\text{N}_4$ . (a) FM, (b) inter-AFM, (c) intra-SAFM1, (d) intra-SAFM2, and (e) intra-ZAFM, respectively. (f) Schematic of the different exchange interactions.

The exchange parameters are obtained from magnetic energies calculations, which is written as

$$\begin{aligned} E_{FM} &= E_0 - 6J_1^{\text{intra}} - 6J_2^{\text{intra}} - J_1^{\text{inter}} - 6J_2^{\text{inter}} \\ E_{\text{inter-AFM}} &= E_0 - 6J_1^{\text{intra}} - 6J_2^{\text{intra}} + J_1^{\text{inter}} + 6J_2^{\text{inter}} \\ E_{\text{intra-SAFM1}} &= E_0 + 2J_1^{\text{intra}} + 2J_2^{\text{intra}} - J_1^{\text{inter}} + 2J_2^{\text{inter}} \\ E_{\text{intra-SAFM2}} &= E_0 + 2J_1^{\text{intra}} + 2J_2^{\text{intra}} + J_1^{\text{inter}} - 2J_2^{\text{inter}} \\ E_{\text{intra-ZAFM}} &= E_0 + 2J_1^{\text{intra}} - 2J_2^{\text{intra}} - J_1^{\text{inter}} + 2J_2^{\text{inter}} \end{aligned}$$

where,  $J^{\text{intra}}$  and  $J^{\text{inter}}$  correspond to exchange interactions between atoms from intralayer and interlayers, respectively.  $J_1$  and  $J_2$  correspond to the first- and second-nearest neighboring exchange interactions.

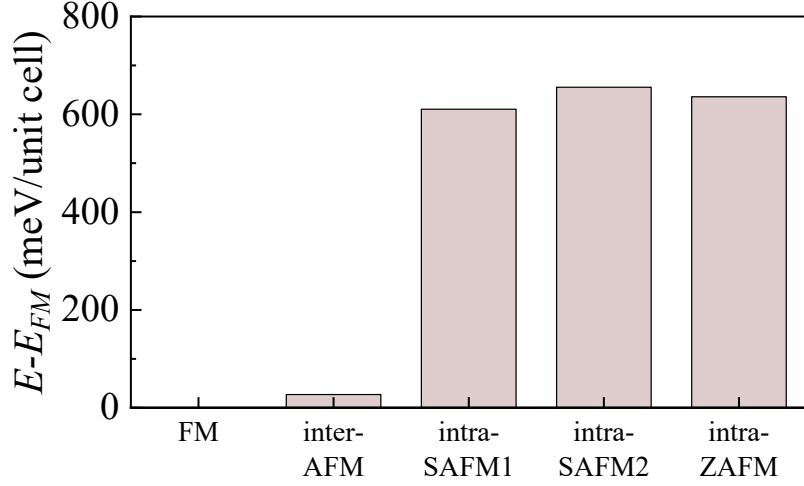

FIG. S2. The energy difference between the five magnetic structures and FM structure.

Table. S1. The calculated exchange parameters of  $\text{TiCr}_2\text{N}_4$  monolayer.

|              | $J_1^{intra}$ | $J_2^{intra}$ | $J_1^{inter}$ | $J_2^{inter}$ |
|--------------|---------------|---------------|---------------|---------------|
| $J$ (meV/Cr) | 36.3          | 2.4           | -6.8          | 2.3           |

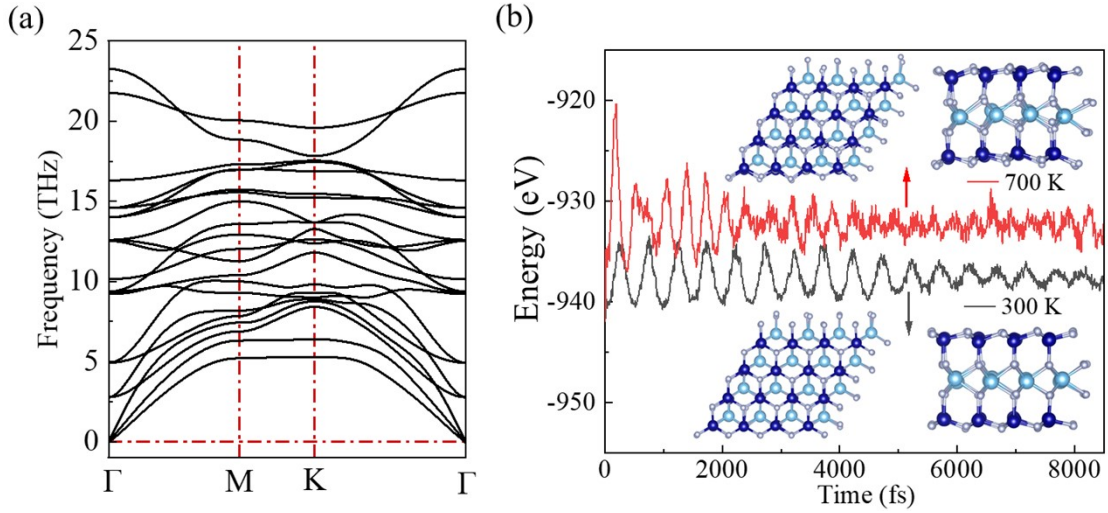

FIG. S3. (a) The phonon dispersion of  $\text{TiCr}_2\text{N}_4$  monolayer. (b) The ab-initio molecular dynamic simulation of  $\text{TiCr}_2\text{N}_4$  monolayer under 300 K and 700 K.

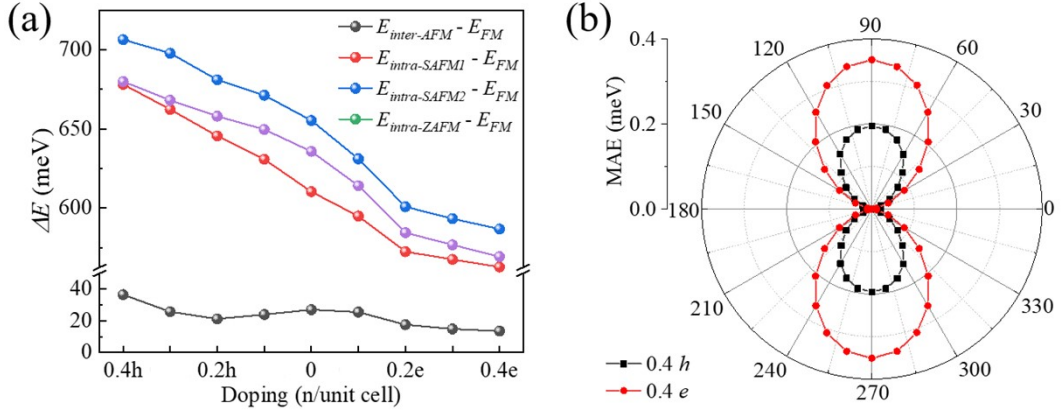

FIG. S4. (a) Energy difference between the FM structure and the four AFM structures under electrostatic doping. (b) MAE of  $\text{TiCr}_2\text{N}_4$  monolayer under 0.4 electron and hole doping per unit cell. The  $0^\circ$  and  $90^\circ$  correspond to the in-plane and out-of-plane directions, respectively.

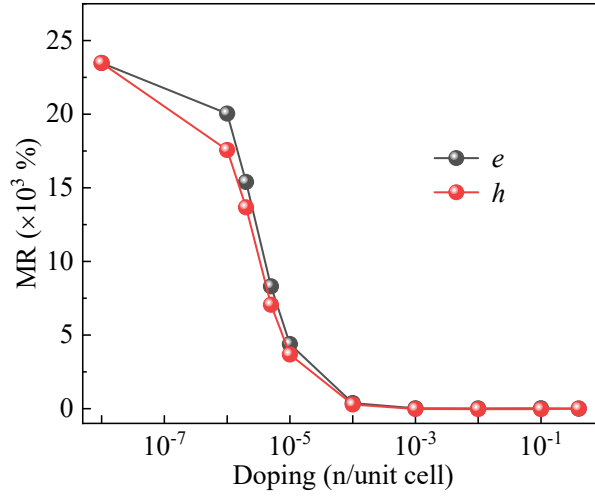

FIG. S5. Calculated MR ratio of monolayer  $\text{TiCr}_2\text{N}_4$  under electrostatic doping.

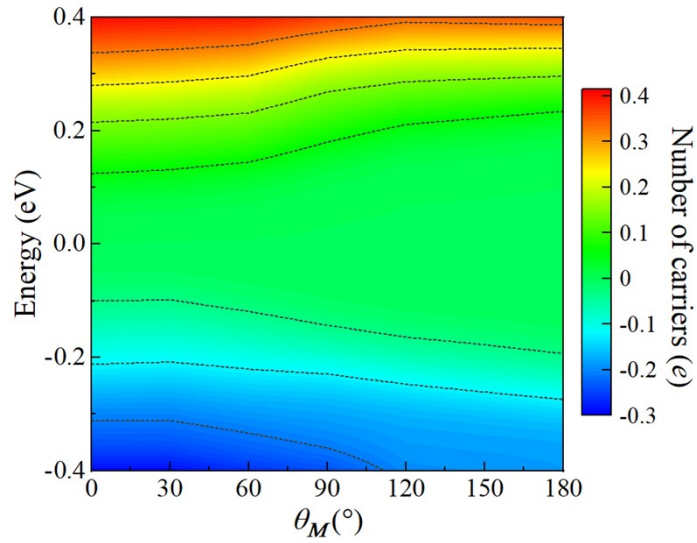

FIG. S6. Number of carriers near Fermi level under different magnetization angle between the top and bottom Cr atoms.

## II. Perturbation theory analysis on magnetic anisotropy.

The spin-orbit coupling (SOC) Hamiltonian can be expressed as

$$H^{SL} = \lambda \mathbf{S} \cdot \mathbf{L} = \lambda(S_x L_x + S_y L_y + S_z L_z).$$

When the magnetization direction is characterized by the Euler angle  $\theta$  and  $\varphi$ , one can obtain

$$H^{SL} = \lambda S(\cos \varphi \sin \theta L_x + \sin \varphi \sin \theta L_y + \cos \theta L_z).$$

The SOC induced energy the variation on total energy comes in the second-order term of the perturbation

$$E^{SL} = -\sum_{o,u} \frac{\left| \langle o | H^{SL} | u \rangle \right|^2}{\delta_{uo}}.$$

Due to the empty spin-down states, only two types of SOC need to be considered, which are  $\langle o^\uparrow | H^{SL} | u^\uparrow \rangle$  and  $\langle o^\uparrow | H^{SL} | u^\downarrow \rangle$ . For  $\text{TiCr}_2\text{N}_4$  monolayer, the occupied state is  $e_g^\uparrow$ . The unoccupied states are  $t_{2g}^\uparrow$ ,  $e_g^\downarrow$ , and  $t_{2g}^\downarrow$ , respectively. Based on the occupancy, the variation on SOC energy is

$$\begin{aligned} E_{(\theta,\varphi)}^{SL} &= -\lambda^2 \left( \frac{\left| \langle e_g^\uparrow | \mathbf{S} \cdot \mathbf{L} | t_{2g}^\uparrow \rangle \right|^2}{\delta_1^{\uparrow\uparrow}} + \frac{\left| \langle e_g^\uparrow | \mathbf{S} \cdot \mathbf{L} | e_g^\downarrow \rangle \right|^2}{\delta_1^{\uparrow\downarrow}} + \frac{\left| \langle e_g^\uparrow | \mathbf{S} \cdot \mathbf{L} | t_{2g}^\downarrow \rangle \right|^2}{\delta_2^{\uparrow\downarrow}} \right) \\ &= -\lambda^2 \frac{1}{4} \left( \frac{\cos^2 \theta + 3}{\delta_1^{\uparrow\uparrow}} + \frac{4 \sin^2 \theta}{\delta_1^{\uparrow\downarrow}} + \frac{\sin^2 \theta + 6}{\delta_2^{\uparrow\downarrow}} \right) \\ &= -\lambda^2 \frac{1}{4} \left( -\frac{1}{\delta_1^{\uparrow\uparrow}} + \frac{4}{\delta_1^{\uparrow\downarrow}} + \frac{1}{\delta_2^{\uparrow\downarrow}} \right) \sin^2 \theta - \lambda^2 \frac{1}{4} \left( \frac{4}{\delta_1^{\uparrow\uparrow}} + \frac{6}{\delta_2^{\uparrow\downarrow}} \right) \end{aligned}$$

, which shows no dependence on the angle  $\varphi$ . Then, MAE can be obtained via

$$\text{MAE} = E_\theta - E_x = A \cos^2 \theta, \text{ where } A = \frac{\lambda^2}{4} \left( -\frac{1}{\delta_1^{\uparrow\uparrow}} + \frac{4}{\delta_1^{\uparrow\downarrow}} + \frac{1}{\delta_2^{\uparrow\downarrow}} \right) \text{ is treated as is a normalized}$$

parameter.

## III. Band gap induced variation on MR ratio.

For semiconductors, conductivity can be calculated by  $\sigma = nq\mu$ , where  $n$  is the carrier concentration,  $q$  is the charge of an electron or hole, and  $\mu$  is the carrier mobility, respectively. The variation on carrier concentration induced by change of band gaps is  $n = n_0 e^{-E_{\text{gap}}/2k_B T}$ . Then, the MR ratio can be estimated via

$$\begin{aligned}
MR &= \frac{\sigma_{\theta_M} - \sigma_{AP}}{\sigma_{AP}} \times 100\% = \frac{(n_{\theta_M} - n_{AP})q\mu}{n_{AP}q\mu} \times 100\% \\
&= \frac{n_{\theta_M} - n_{AP}}{n_{AP}} \times 100\% = \frac{e^{-E_{\theta_M}/2k_B T} - e^{-E_{AP}/2k_B T}}{e^{-E_{AP}/2k_B T}} \times 100\% \\
&= (e^{(E_{AP} - E_{\theta_M})/2k_B T} - 1) \times 100\% \\
&\approx e^{\frac{\Delta E_{gap}}{2k_B T}} \times 100\%
\end{aligned}$$

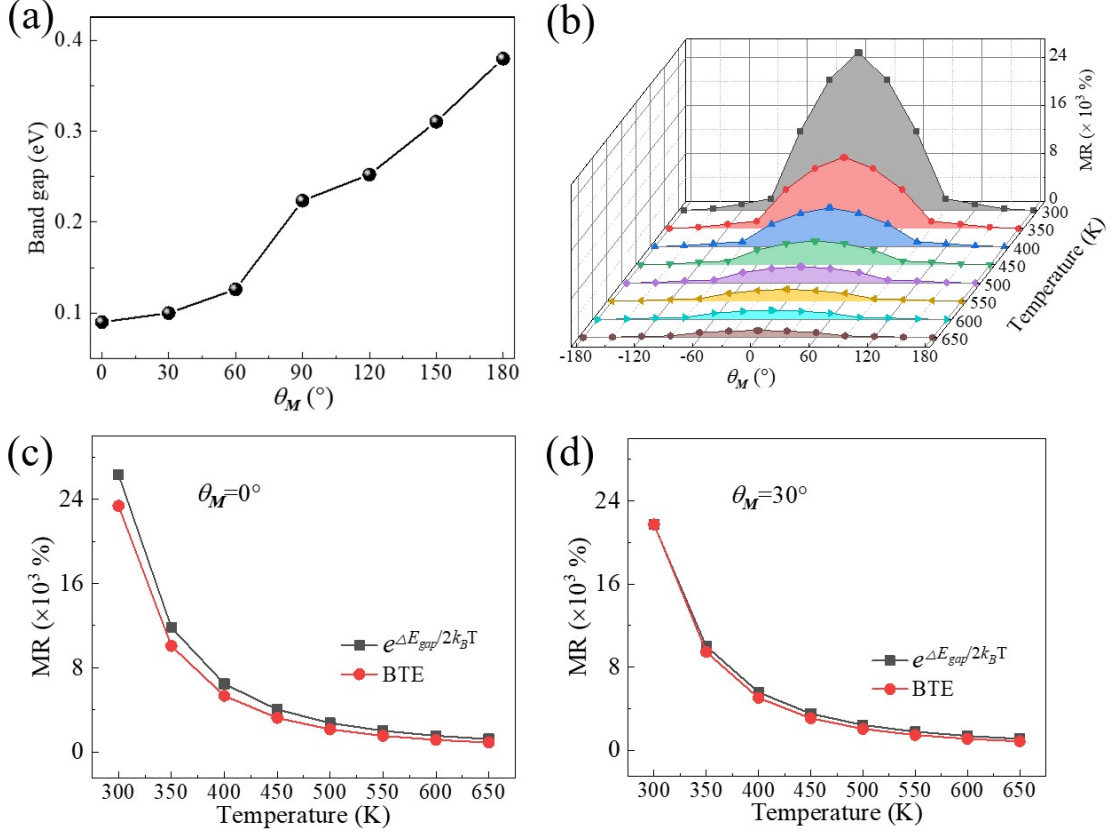

**FIG. S7.** (a) The value of band gaps under different  $\theta_M$  and (b) evaluation of MR ratio by using band gaps of the TiCr<sub>2</sub>N<sub>4</sub> monolayer. Comparison of MR ratio obtained from different methods at (c)  $\theta_M = 0^\circ$  and (d)  $\theta_M = 30^\circ$ , respectively

#### IV. Projected density of states and band structures.

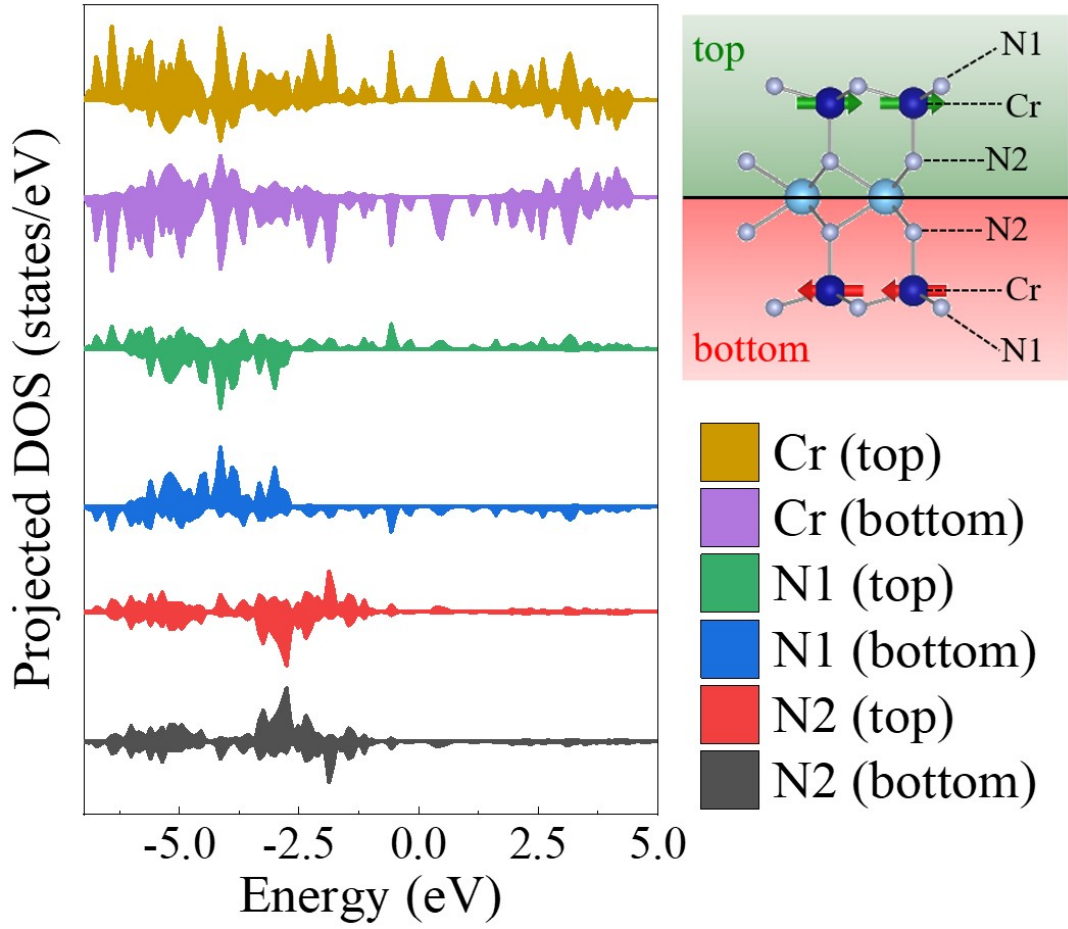

Fig. S8. Projected density of states (DOS) of  $\text{TiCr}_2\text{N}_4$  monolayer under AP configuration.

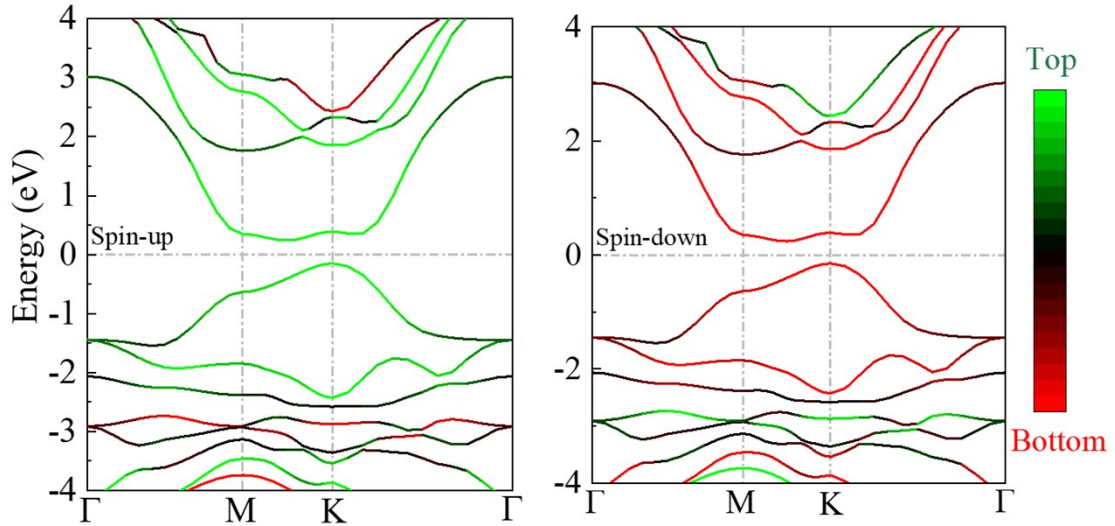

Fig. S9. Donation of the top and bottom atoms for the band structures under AP configuration.
